# Supplementary material for: Traumatic Hallux Varus Treated by Minimally Invasive Extensor Hallucis Brevis Tenodesis
Source: Case Rep Orthop. 2015 Dec 17;2015:179642. doi: 10.1155/2015/179642 (PMC4697074; doi:10.1155/2015/179642)
Supplement: Supplementary file 1 — Video 1: There was increased ease of passive abduction of the left great toe as compared to the right side which signified laxity of the lateral collateral ligament of the first metatarsophalangeal joint. Video 2: the stability of the first metatarsophalangeal joint to varus stress was restored after extensor hallucis brevis tenodesis. [file 179642.f1.zip]

Archive with 3 entries (2 files):
- 179642.f1/
- 179642.f1/video 1.mpg
- 179642.f1/video 2.mpg
